# Supplementary material for: Scavenger receptor MARCO contributes to cellular internalization of exosomes by dynamin-dependent endocytosis and macropinocytosis
Source: PubMed Central journal article supplement (PMC7733512; doi:10.1038/s41598-020-78464-2), 2020-12-11
Supplement: 41598_2020_78464_MOESM2_ESM.pdf [file 41598_2020_78464_MOESM2_ESM.pdf]

## **Scavenger receptor MARCO contributes to cellular internalization of exosomes by dynamin-dependent endocytosis and macropinocytosis**

Sanae Kanno<sup>a\*</sup>, Seishiro Hirano<sup>b</sup>, Tsubasa Sakamoto<sup>a</sup>, Akiko Furuyama<sup>b</sup>, Hiroshi Takase<sup>c</sup>, Hideaki Kato<sup>a</sup>, Mamiko Fukuta<sup>a</sup>, Yasuhiro Aoki<sup>a</sup>

<sup>a</sup> Department of Forensic Medicine, Nagoya City University Graduate School of Medical Sciences, 1 Kawasumi, Mizuho-cho, Mizuho-ku, Nagoya 467-8601, Japan

<sup>b</sup> Center for Health and Environmental Risk Research, National Institute for Environmental Studies, 16-2 Onogawa, Tsukuba, Ibaraki 305-8506, Japan

<sup>c</sup> Core Laboratory, Nagoya City University Graduate School of Medical Sciences, 1 Kawasumi, Mizuho-cho, Mizuho-ku, Nagoya 467-8601, Japan

\*Correspondence should be addressed to: Sanae Kanno, Ph.D.

Department of Forensic Medicine, Graduate School of Medical Sciences, Nagoya City University, 1 Kawasumi, Mizuho-cho, Mizuho-ku, Nagoya 467-8601, Japan

Tel: +81-52-853-8180

E-mail: [sanae@med.nagoya-cu.ac.jp](mailto:sanae@med.nagoya-cu.ac.jp)

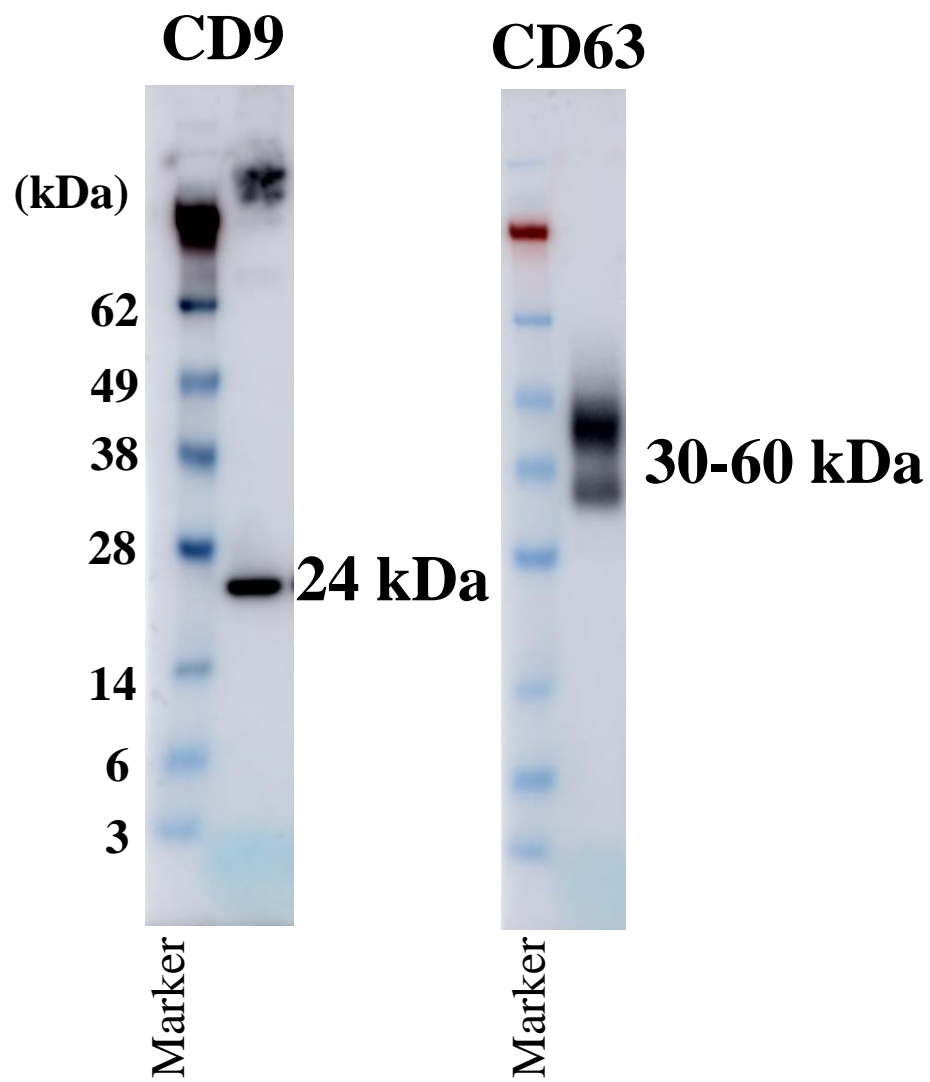

**CHO-CT**

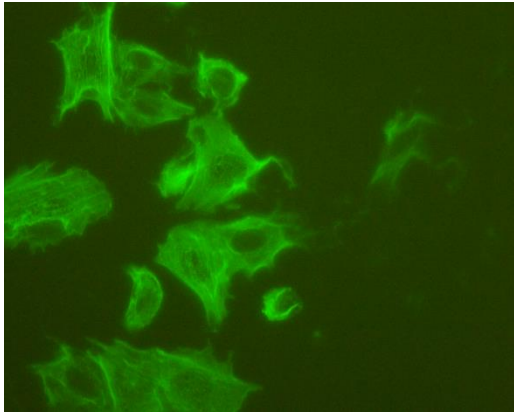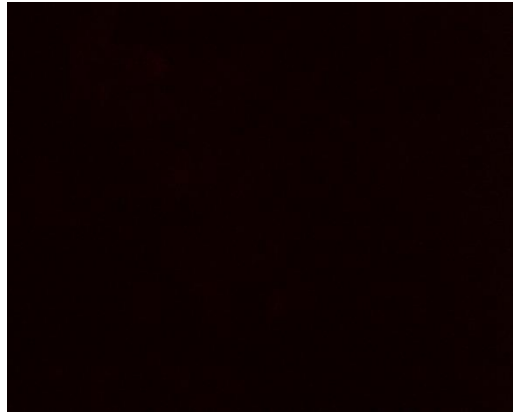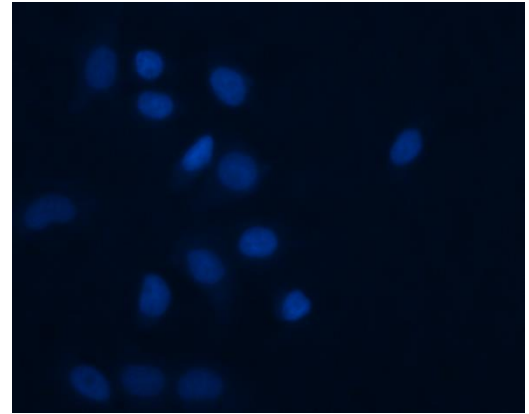

**CHO-MARCO**

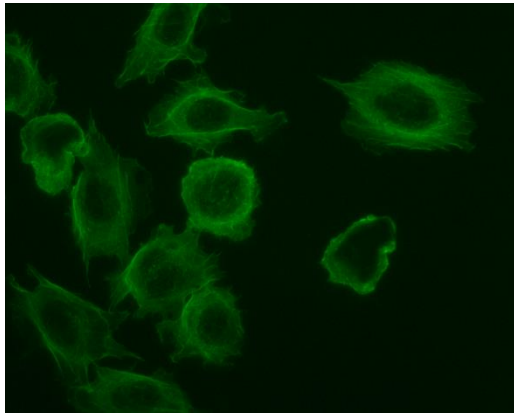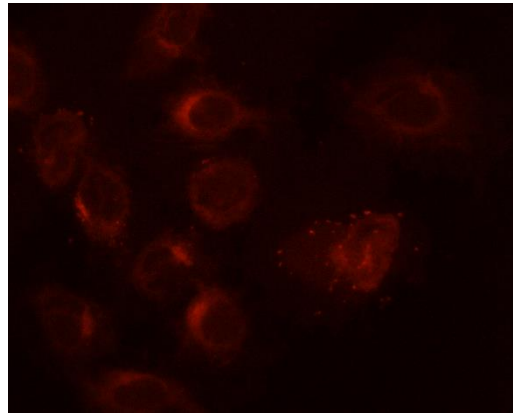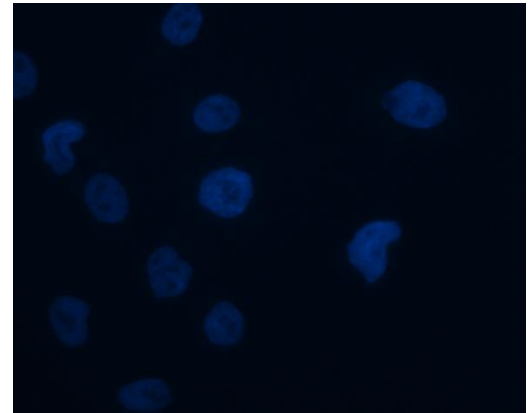

**Phalloidin**

**Exosome**

**DAPI**

**CHO-CT**

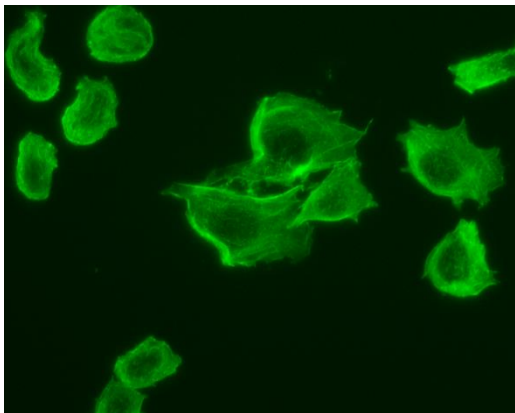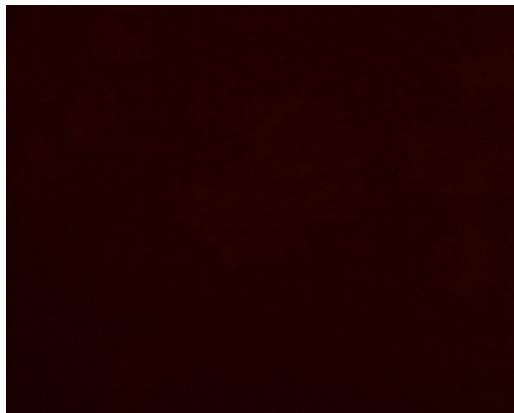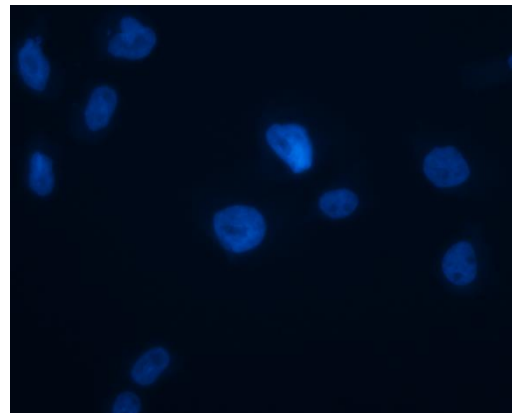

**CHO-MARCO**

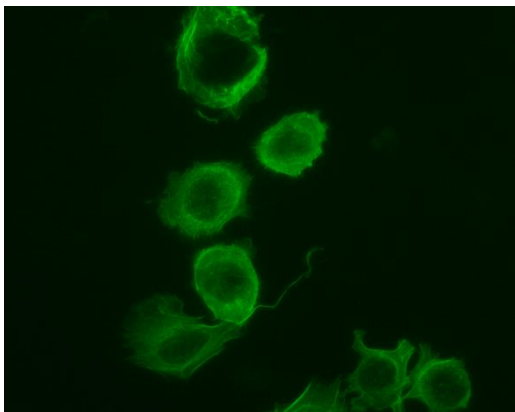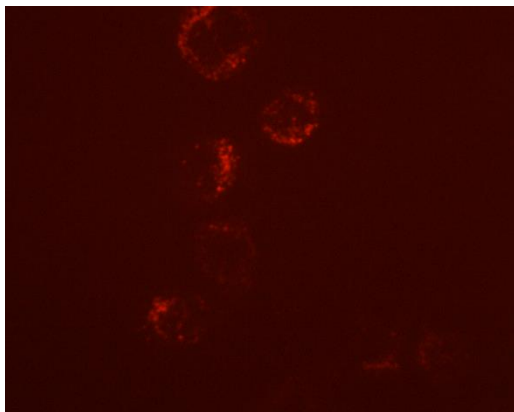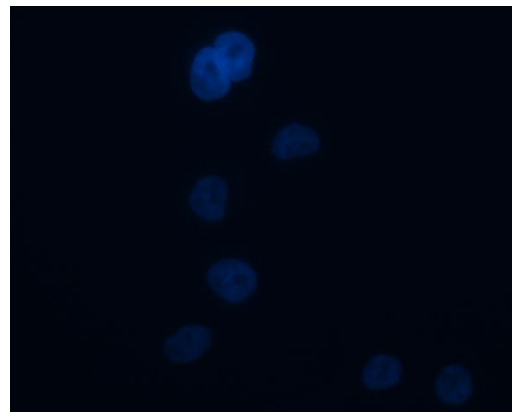

**Phalloidin**

**Fluorescent beads**

**DAPI**

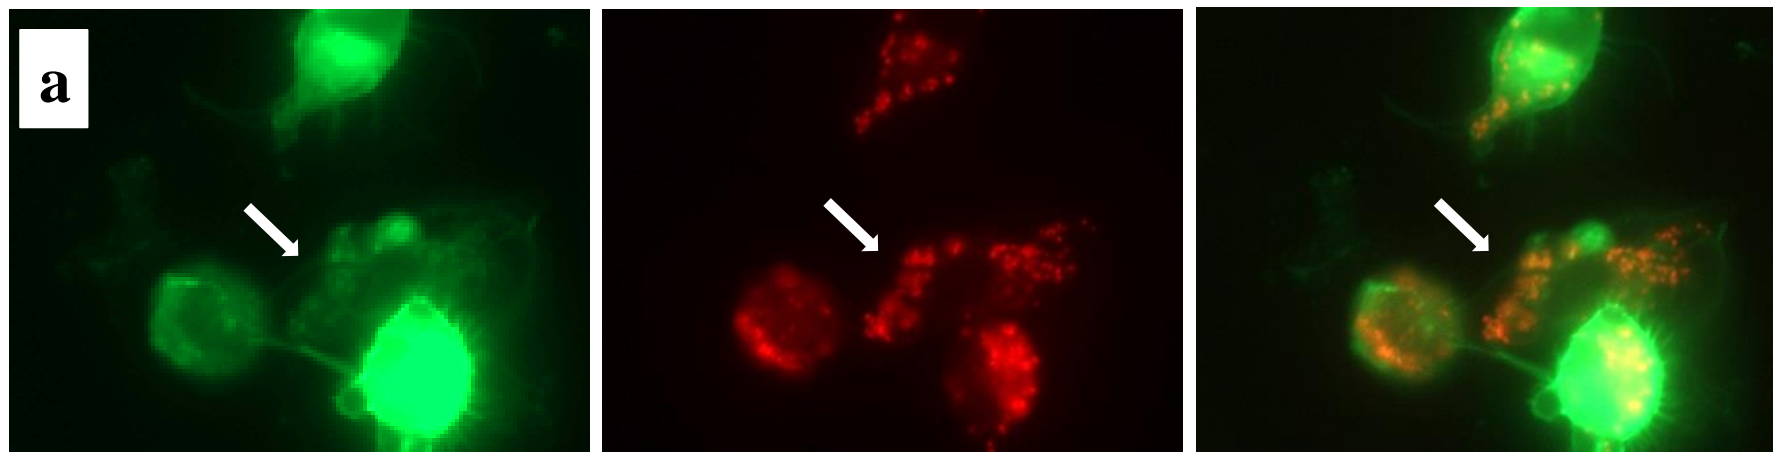

**GFP-MARCO**

**Exosomes**

**Merge**

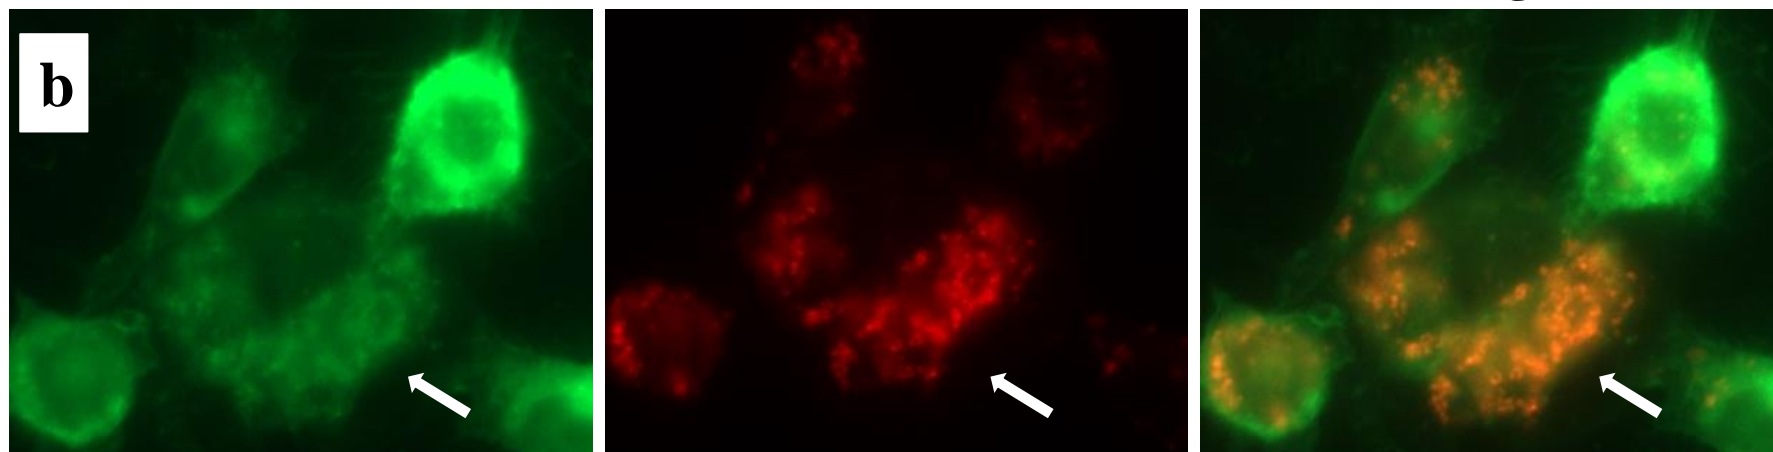

**GFP-MARCO**

**20 nm-particles**

**Merge**

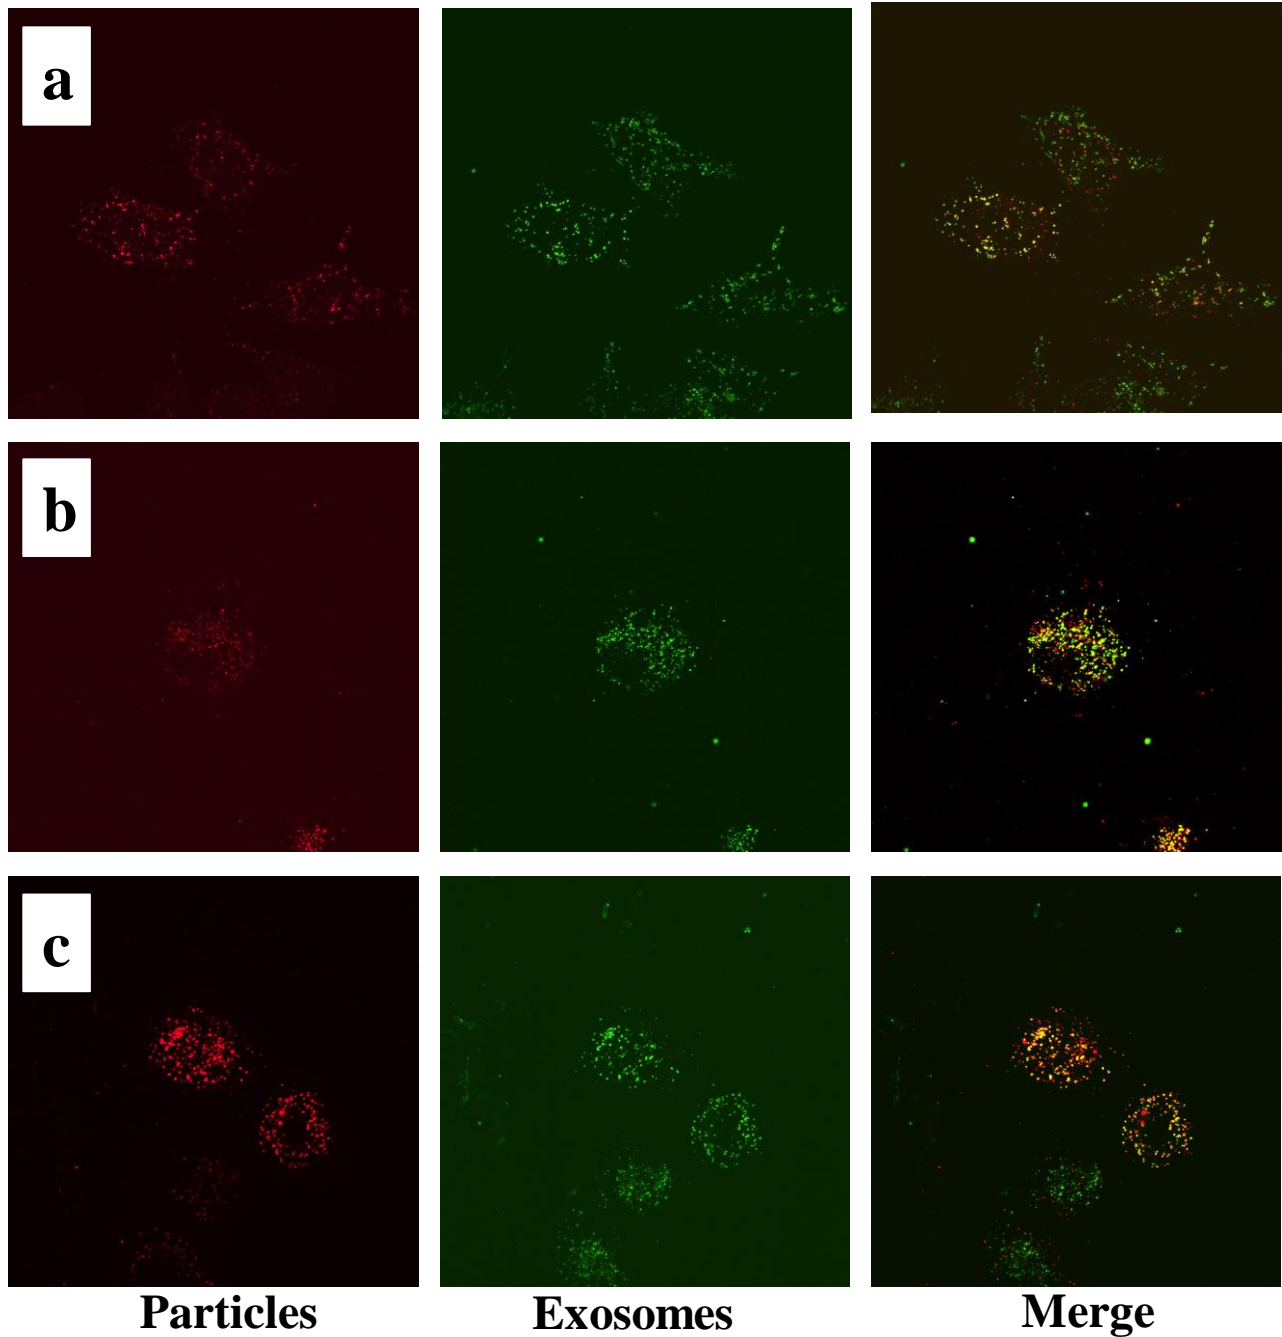

**Particles**

**Exosomes**

**Merge**

Supplemental Fig. 4
